# Supplementary material for: A convenient method for isolating carbon quantum dots in high yield as an alternative to the dialysis process and the fabrication of a full-band UV blocking polymer film
Source: Royal Society of Chemistry journal article supplement (doi:10.1039/c8nj04615h), 2018-01-01
Supplement: c8nj04615h1.pdf [file c8nj04615h1.pdf]

# **A convenient method for isolating carbon quantum dots in high yield as alternative to dialysis process and fabrication of full-band UV blocking polymer film**

Periyayya Uthirakumar<sup>a,b,\*</sup>, M. Devendiran<sup>b</sup>, Tae Hwan Kim<sup>a</sup>, and In-Hwan Lee<sup>a,\*</sup>

<sup>a</sup> *Department of Materials Science and Engineering, Korea University, Seoul 02841, South Korea*

<sup>b</sup> *Nanoscience Center for Optoelectronic and Energy Devices, Sona College of Technology, Salem, Tamilnadu 636005, India*

\*Corresponding authors: Tel: +82-2-3290-2364. E-mail: [uthirakumar@sonatech.ac.in](mailto:uthirakumar@sonatech.ac.in) (P. Uthirakumar); [ihlee@korea.ac.kr](mailto:ihlee@korea.ac.kr) (In-Hwan Lee).

**Figure S1**

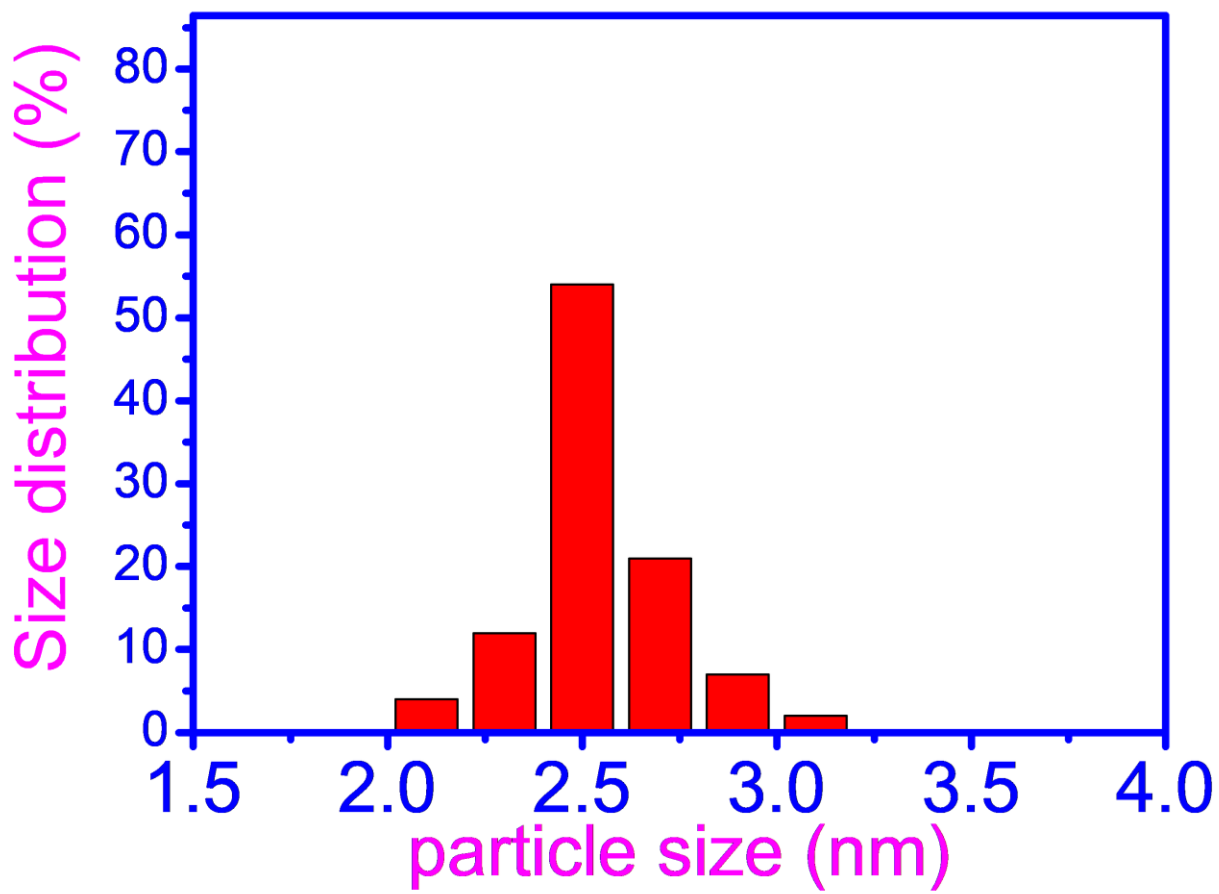

Fig. S1. The particle size histogram from TEM image

Figure S2

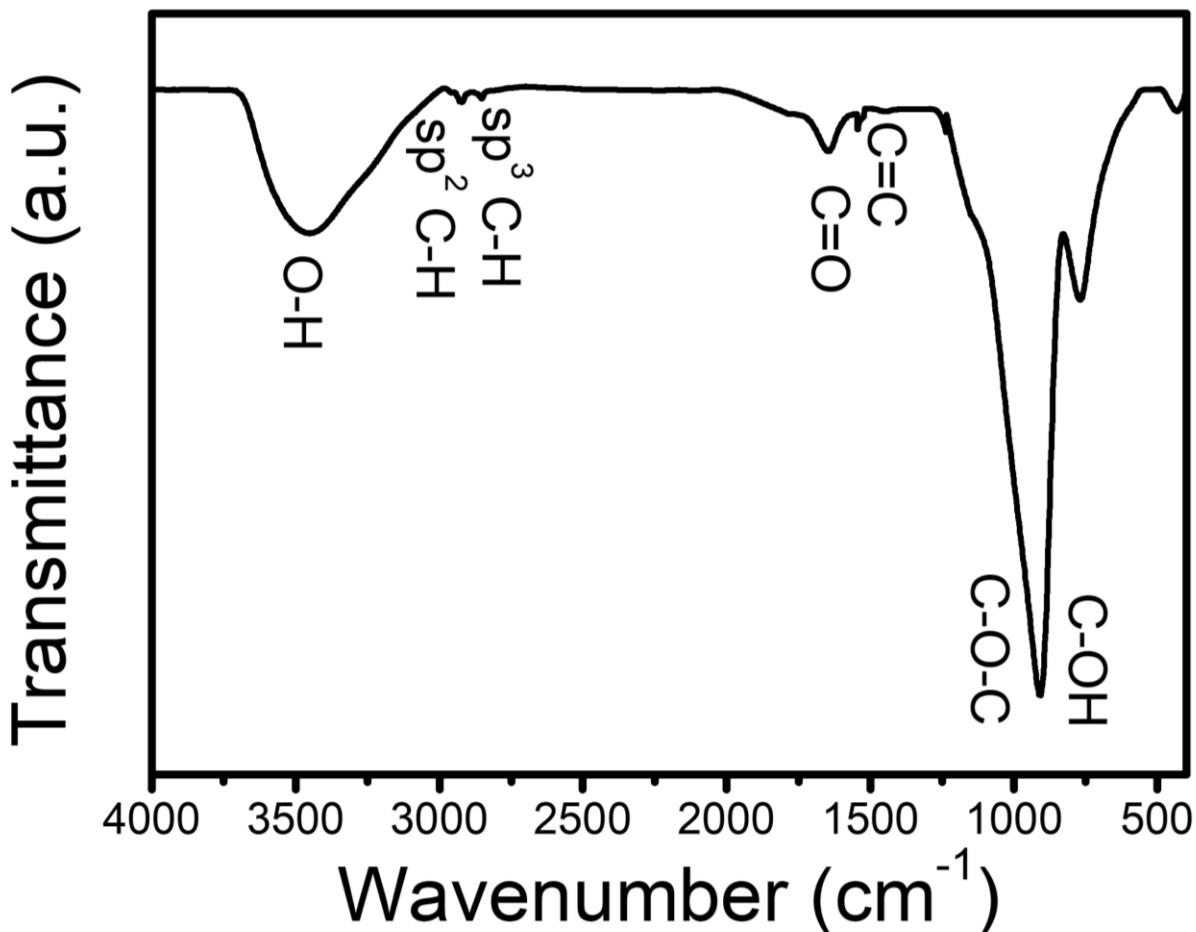

Fig. S2. FT-IR spectrum of CQD isolated via a solvent extraction method

A broad absorption band observed in the range 3000–3600 cm<sup>-1</sup>, associated to the stretching modes of the hydroxyl (–OH) group. Other absorption bands at 3072 cm<sup>-1</sup> and 2985 cm<sup>-1</sup> are due to sp<sup>2</sup> and sp<sup>3</sup> C–H stretching modes, respectively. Also, an alkene (C=C) and carboxylic acid (C=O) stretching mode are observed at 1540 cm<sup>-1</sup> and 1651 cm<sup>-1</sup>, respectively. An intense and sharp bands at range 905 cm<sup>-1</sup>, which corresponded to asymmetric and symmetric C–O–C stretching vibrations and secondary C–OH stretching modes.

Figure S3

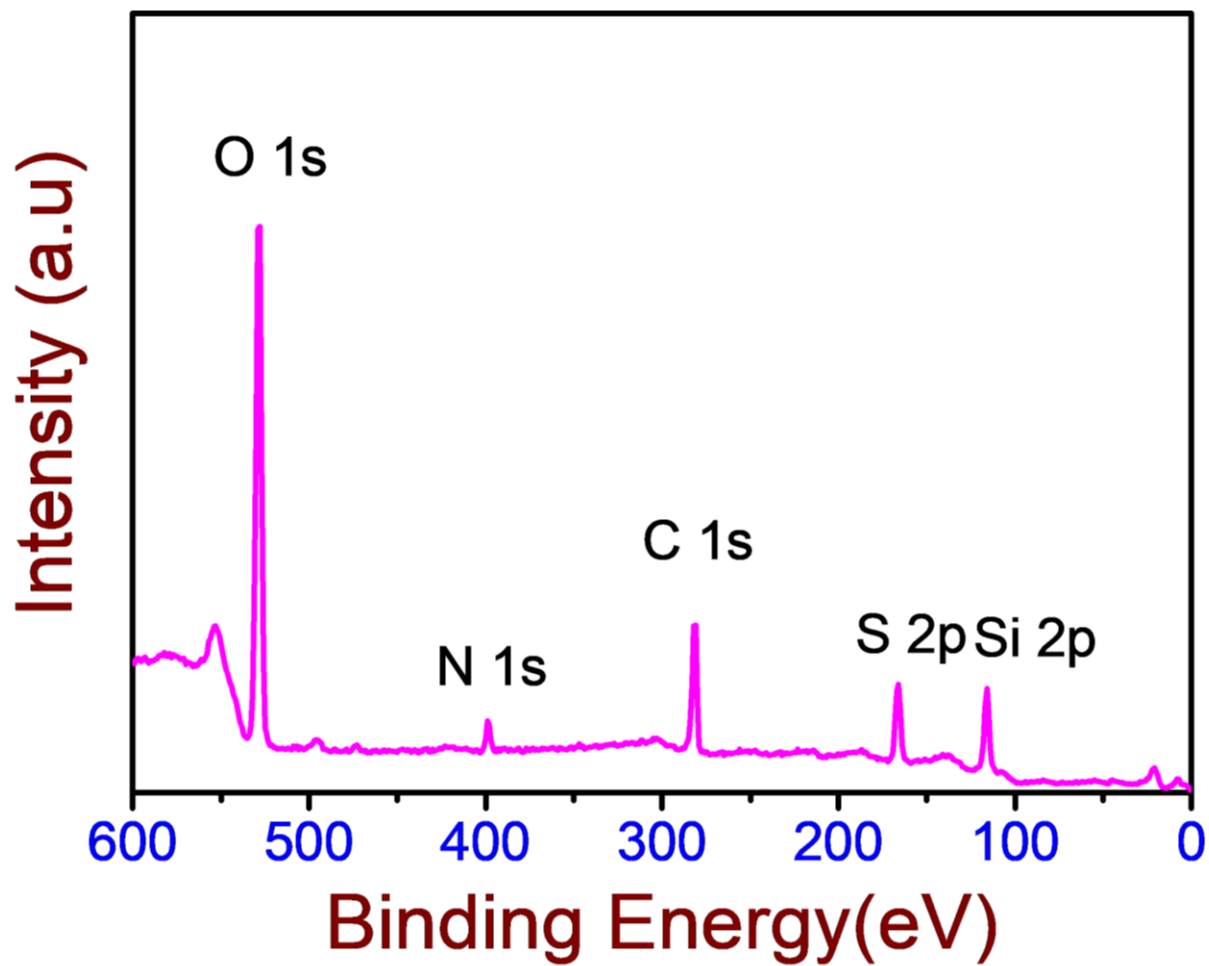

Fig. S3. The full survey XPS spectrum of CQD isolated via a solvent extraction method

**Figure S4**

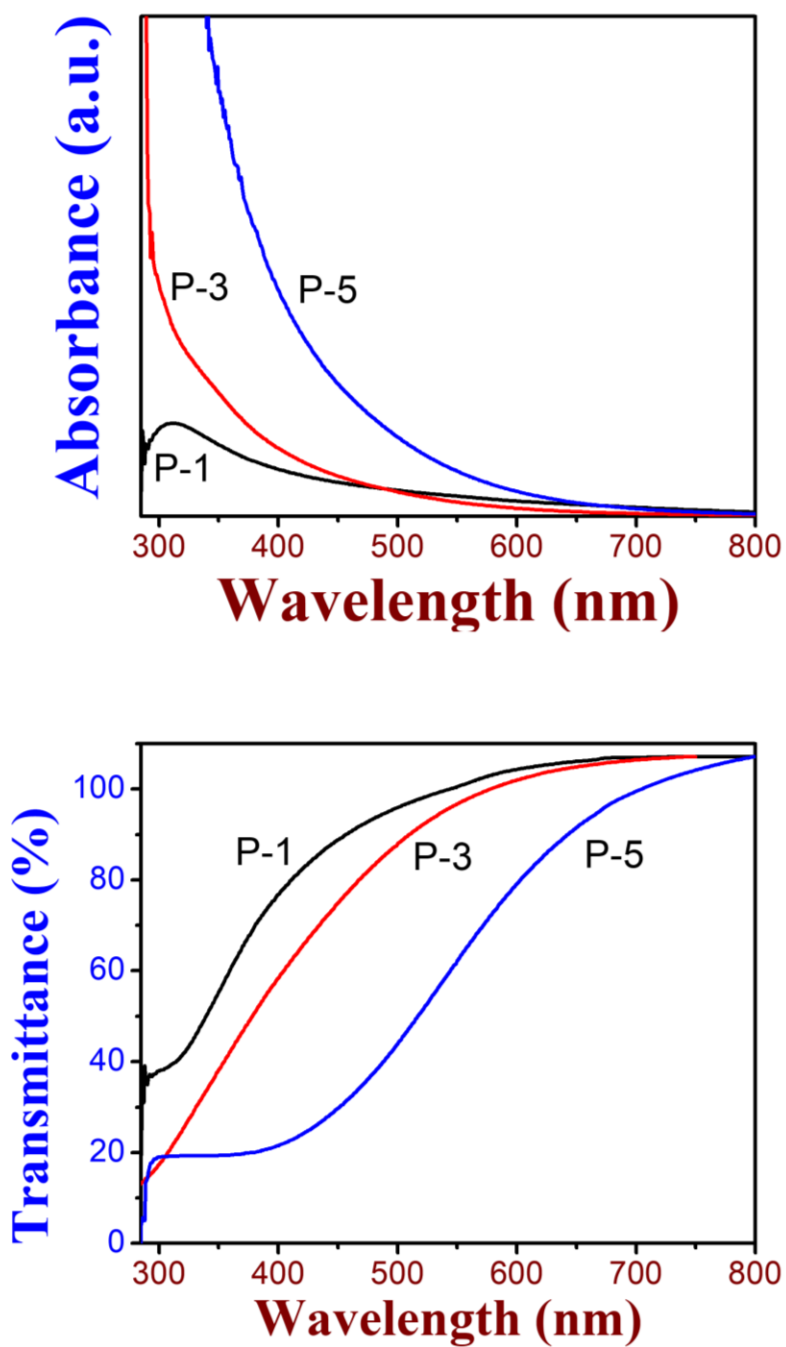

Fig. S4. UV absorbance (top) and transmittance (bottom) spectra of CQD dispersed polymer films

Figure S5

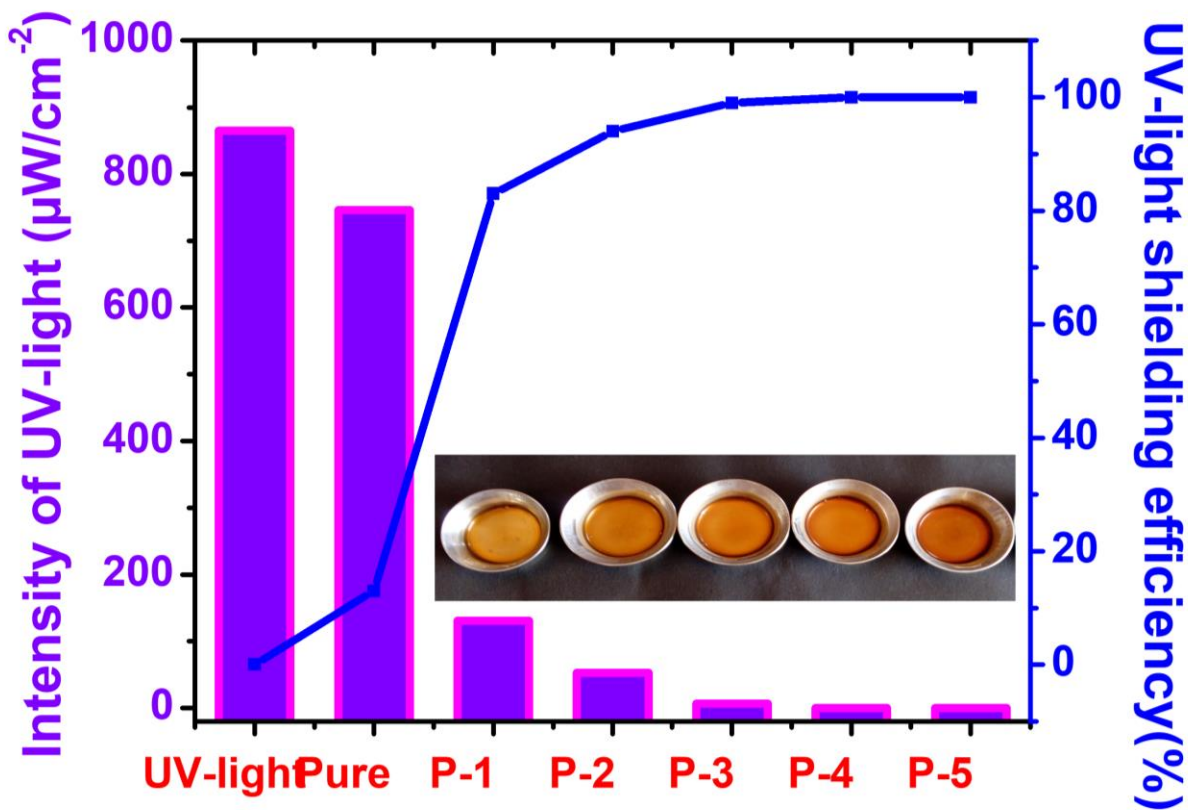

Fig. S5. UV shielding capability as the function of increasing CQD content under the illumination of a UV lamp. [Inset: photograph of polymer films after curing]
